# Supplementary material for: Seeing the “Big” Picture: Big Data Methods for Exploring Relationships Between Usage, Language, and Outcome in Internet Intervention Data
Source: PubMed Central journal article supplement (PMC5023946; doi:10.2196/jmir.5725), 2016-08-31

# Cluster Quality

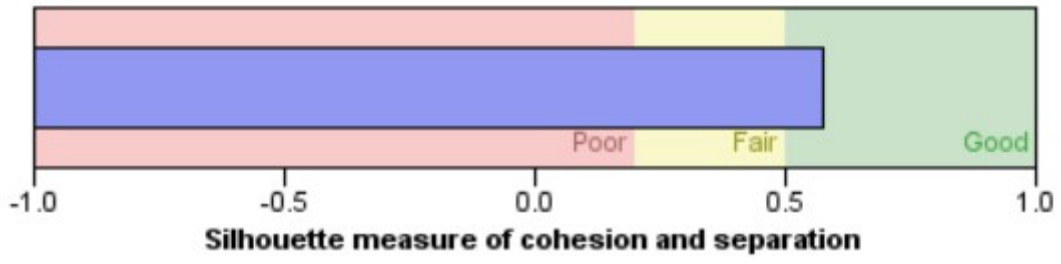

Supplement: jmir_v18i8e241_app1.pdf [file jmir_v18i8e241_app1.pdf]
