# Supplementary material for: Seeing the “Big” Picture: Big Data Methods for Exploring Relationships Between Usage, Language, and Outcome in Internet Intervention Data
Source: PubMed Central journal article supplement (PMC5023946; doi:10.2196/jmir.5725), 2016-08-31
Supplement: jmir_v18i8e241_app2.pdf [file jmir_v18i8e241_app2.pdf]

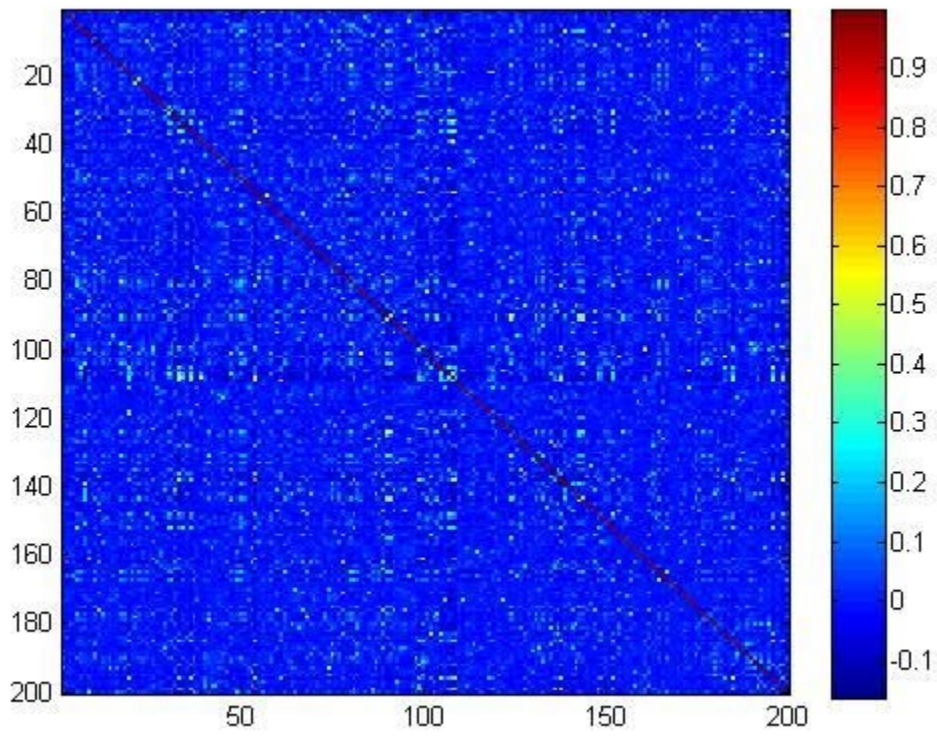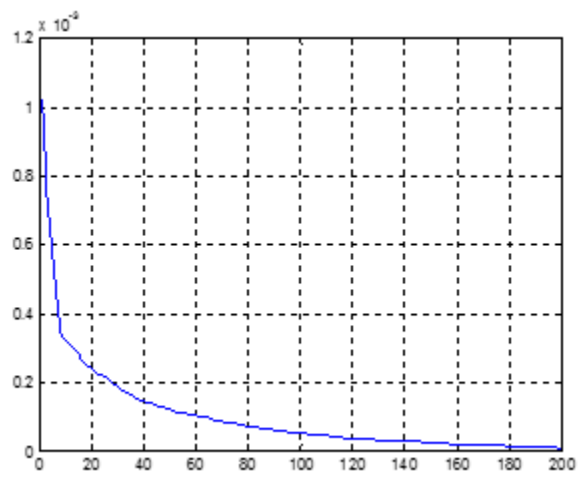

Eigenvalues of the Correlation Matrix of Topic Scores
