# Supplementary material for: Seeing the “Big” Picture: Big Data Methods for Exploring Relationships Between Usage, Language, and Outcome in Internet Intervention Data
Source: PubMed Central journal article supplement (PMC5023946; doi:10.2196/jmir.5725), 2016-08-31
Supplement: jmir_v18i8e241_app3.pdf [file jmir_v18i8e241_app3.pdf]

## 5 topics most strongly predictive of Positive Emotion

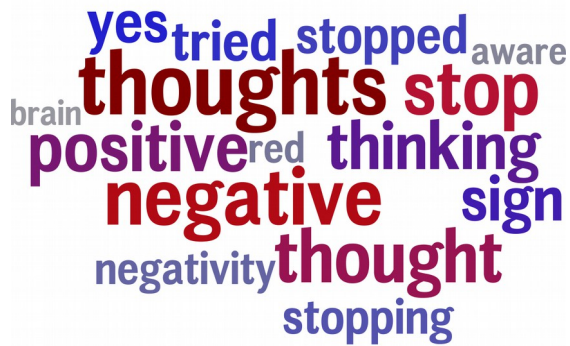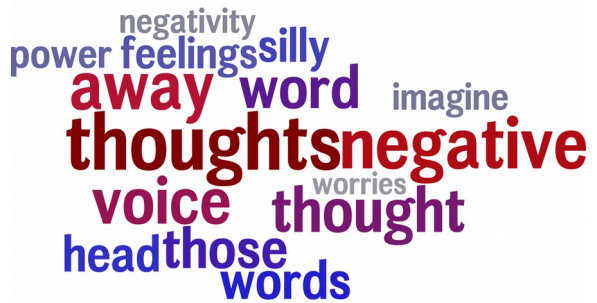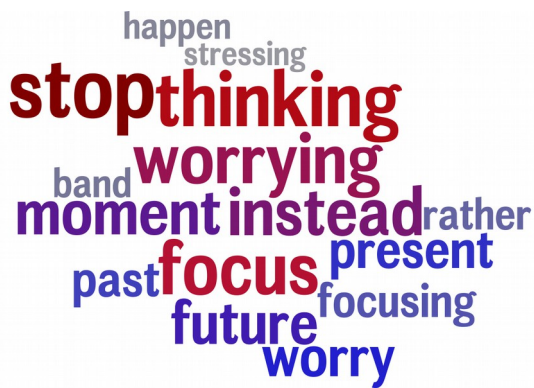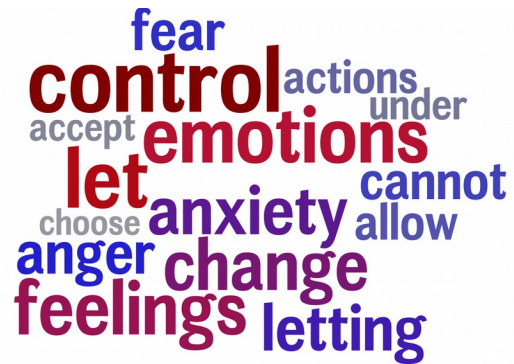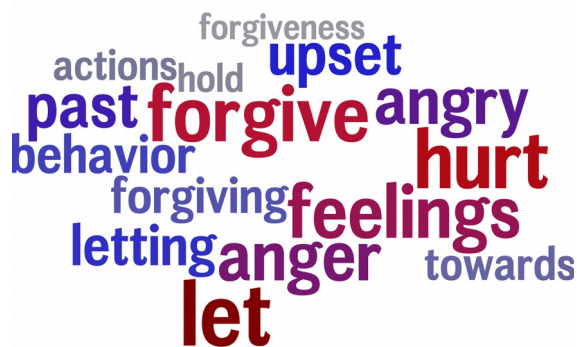

## 5 topics most strongly predictive of Life Satisfaction

stopped  
thinking negativity  
positive negative  
thought stopping  
thoughts sign  
tried stop  
red yes

negativity  
power feelings silly  
away word imagine  
thoughts negative  
voice thought worries  
head those  
words

outlook positivity  
change situation  
positive focus  
negative stay  
keep thinking side  
attitude positives  
energy focused

fear  
control actions under  
accept emotions  
let anxiety cannot  
choose allow  
anger change  
feelings letting

see glad  
excited  
happy seemed proud  
celebrate very  
share news felt hear  
wish tell genuinely
