# Supplementary material for: Seeing the “Big” Picture: Big Data Methods for Exploring Relationships Between Usage, Language, and Outcome in Internet Intervention Data
Source: PubMed Central journal article supplement (PMC5023946; doi:10.2196/jmir.5725), 2016-08-31
Supplement: jmir_v18i8e241_app5.pdf [file jmir_v18i8e241_app5.pdf]

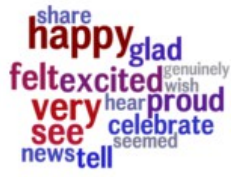

$r = .06$

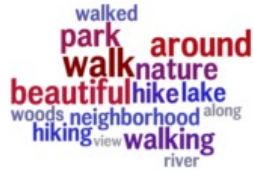

$r = .04$

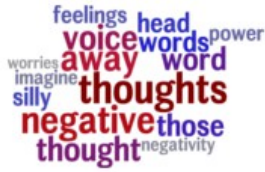

$r = .05$

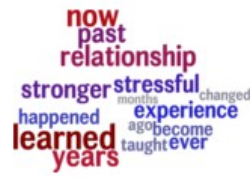

$r = .04$

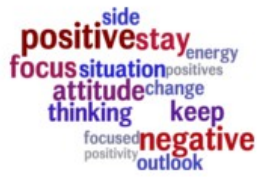

$r = .05$
